# Dopaminergic network connectivity alterations are associated with postoperative cognitive dysfunction

Florian Lammers-Lietz<sup>a\*</sup>, Friedrich Borchers<sup>a</sup>, Insa Feinkohl<sup>b,1</sup>, Cicek Kanar<sup>a,2</sup>, Henning Krampe<sup>1</sup>, Gregor Lichtner<sup>c</sup>, Jayanth Sreekanth<sup>1</sup>, Janine Wiebach<sup>d,3</sup>, Martin Weygandt<sup>e</sup>, Claudia Spies<sup>a</sup>, Georg Winterer<sup>a,f,4</sup>, Friedemann Paul<sup>e,g</sup> for the BioCog consortium

a Department of Anesthesiology and Intensive Care Medicine, Charité-Universitätsmedizin Berlin, corporate member of Freie Universität Berlin and Humboldt-Universität zu Berlin, Augustenburger Platz 1, 13353 Berlin, Germany

b Max-Delbrück-Center for Molecular Medicine in the Helmholtz Association (MDC), Molecular Epidemiology Research Group, Robert-Rössle-Straße 10, 13125 Berlin, Germany

c Department of Anesthesiology, Intensive Care, Emergency and Pain Medicine, Universitätsmedizin Greifswald, Ferdinand-Sauerbruch-Straße, 17475 Greifswald, Germany

d Charité-Universitätsmedizin Berlin, corporate member of Freie Universität Berlin and Humboldt-Universität zu Berlin, Institute of Biometry and Clinical Epidemiology, Charitéplatz 1, 10117 Berlin, Germany

e Experimental and Clinical Research Center, Max Delbrück Center for Molecular Medicine and Charité-Universitätsmedizin Berlin, corporate member of Freie Universität Berlin and Humboldt-Universität zu Berlin, Lindenberger Weg 80, 13125 Berlin, Germany

f Pharmaimage Biomarker Solutions GmbH, Robert-Rössle-Str. 10, 13125 Berlin, Germany

g Charité-Universitätsmedizin Berlin, corporate member of Freie Universität Berlin and Humboldt-Universität zu Berlin, Charitéplatz 1, 10117 Berlin, Germany

1 *present address: Faculty of Health at Department of Medicine, Witten/Herdecke University, Witten/Herdecke, Germany*

2 *present address: Molecular Physiology & Cell Biology, Leibniz-Forschungsinstitut für Molekulare Pharmakologie im Forschungsverbund Berlin e.V. (FMP), Berlin, Germany*

3 *present address: Berlin Institute of Health at Charité – Universitätsmedizin Berlin, BIH Metabolomics Platform, Charitéplatz 1, 10117 Berlin, Germany*

4 *present address: Pharmaimage Biomarker Solutions Inc., 245 First Street, Cambridge MA 02142, United States*

\* corresponding author: Florian Lammers-Lietz, Department of Anesthesiology and Intensive Care Medicine, Charité-Universitätsmedizin Berlin, Campus Virchow-Klinikum, Augustenburger Platz 1, 13353 Berlin, Germany (internal address: Mittelallee 3); e-mail: [florian.lammers@charite.de](mailto:florian.lammers@charite.de); phone: ++49 30 450 651 458

## ABSTRACT

Postoperative cognitive dysfunction (POCD) is a detrimental complication after surgery with a lasting impact on the patients' daily life. It is most common after postoperative delirium. Dopaminergic dysfunction has been suggested to play a role in delirium, but little knowledge exists regarding its relevance for POCD. We hypothesized that POCD is associated with altered resting-state functional connectivity of the ventral tegmental area (VTA) and the substantia nigra pars compacta (SNc) in functional magnetic resonance imaging (fMRI) before surgery and at postoperative follow-up after three months.

Patients  $\geq 65$  years old underwent resting-state fMRI and neuropsychological assessment before major elective surgery and at follow-up three months later. POCD was determined as the reliable change index. Connectivity between VTA or SNc and 132 regions were calculated. Principal component analysis (PCA) was used for dimensionality reduction in preoperative connectivity, and components explaining  $>5\%$  of variance were retained for analysis. To study postoperative changes in patients with POCD, we applied the same transformation to postoperative connectivity, and multi-factor analysis. Regression analyses were used to describe connectivity alterations while adjusting for age, sex, MMSE, surgery and anaesthesia.

Of 214 patients, 26 (12%) developed POCD. Among 132 principal components, four components for VTA- and SNc-FC were selected for further analysis. For both VTA and SNc connectivity, one component was significantly associated with POCD. No postoperative alterations of dopaminergic networks were associated with POCD.

Altered preoperative functional connectivity of the dopaminergic system predisposes to POCD. Particularly relevant regions are associated with sensory, especially spatial perception and higher cognitive functions.

## KEYWORDS

dopamine, ventral tegmental area, substantia nigra, surgery, anaesthesia, cognition, connectivity

## HIGHLIGHTS

- Dopaminergic dysfunction is a hallmark of delirium
- No evidence for postoperative cognitive dysfunction (POCD)
- Methods: resting-state functional connectivity of the VTA and SNc
- Connectivity alterations of the VTA and SNc predispose for POCD
- Affected areas involved in perception, spatial processing and cognition

# 1 Introduction

Lasting cognitive impairment is a common problem in 10-50% of older patients undergoing surgery (Androsova *et al.* 2015; Borchers *et al.* 2021). Especially patients who experienced postoperative delirium (POD) have a significantly increased risk (Rudolph *et al.* 2008; Teipel *et al.* 2018). Postoperative cognitive dysfunction (POCD) is associated with increased mortality, length of hospital stay (Suraarunsumrit *et al.* 2024), care costs (Pietzsch *et al.* 2021) and labor market leave (Steinmetz *et al.* 2009). Current guidelines for the assessment of postoperative neurocognitive disorders refer to either minor or major neurocognitive disorder (NCD) based on criteria from neuropsychological testing, impairment in daily activities and subjective cognitive concern (Evered *et al.* 2018). However, past studies have also assessed POCD based solely on cognitive trajectories (Abildstrom *et al.* 2000; Rasmussen *et al.* 2001; Borchers *et al.* 2021).

Dopaminergic dysfunction is thought to be a hallmark of postoperative delirium (Maldonado 2013; Androsova *et al.* 2015), as suggested by genetic studies (van Munster *et al.* 2010b, 2010a) and clinical observations from prodopaminergic (Kuzuhara 2001; Schrag 2004; Mash 2016; Gonin *et al.* 2018) and antidopaminergic substances (Aldecoa *et al.* 2024). However, there is no evidence that antidopaminergic treatment of POD has a beneficial effect on long-term cognitive outcomes: Whereas it is well known that shorter delirium duration is associated with more favorable long-term outcomes (Pisani *et al.* 2009) including cognition (Girard *et al.* 2010), the perioperative application of antipsychotic medication was associated with postoperative cognitive decline (Duprey *et al.* 2022).

Beyond its relation to POD, little is known about the pathogenesis of POCD. Since POD is more common in patients with preoperative cognitive dysfunction (Dasgupta and Dumbrell 2006; Androsova *et al.* 2015), POCD may also reflect manifestation of an undiagnosed chronic neurodegenerative disease. E.g., for Alzheimer's disease (AD), it has been reported that genetic variation of dopaminergic receptors and COMT expression are associated with neuropsychiatric symptoms (Holmes *et al.* 2001; Craig *et al.* 2004; Sweet *et al.* 2005). In Lewy body dementia, dopamine depletion has been found to be associated with poorer cognitive function (Yoo *et al.* 2022). Hence, knowledge on the onset of dopaminergic dysfunction in POCD could help to understand its pathogenesis. If dopaminergic dysfunction is present in POCD before surgery, this would suggest that POCD is a chronic condition with postoperative manifestation, whereas newly observed postoperative dopaminergic dysfunction supports the hypothesis of POCD as a long-term sequelae of perioperative neuronal damage.

In the past, two studies have used functional magnetic resonance imaging (fMRI) to describe ventral tegmental area (VTA) connectivity changes in POD using fMRI (Choi *et al.* 2012; Oh *et al.* 2019), and for both AD and mild cognitive impairment (MCI) (Serra *et al.* 2018, 2021) and Parkinson's disease (PD) (Li *et al.* 2020; Zang *et al.* 2022), dopaminergic network dysfunction observed in fMRI has been reported. In fMRI, correlations of fluctuations in the blood oxygen level-dependent (BOLD) signal can be used to derive measures of co-activation between anatomically distinct brain regions, i.e., functional connectivity. Functional connectivity can be measured during performance of cognitive tasks or rest (resting-state fMRI, rs-fMRI). The latter approach is advantageous in studies on POCD, since rs-fMRI is also feasible in patients with severe cognitive deficits who, e.g., are no longer able to understand cognitive task instructions. Hence, rs-fMRI can provide helpful information on dopaminergic dysconnectivity in POCD, but to our knowledge, no such study has been conducted.

The central nervous dopaminergic system comprises the substantia nigra pars compacta (SNc, A9), containing 75-90% of all dopaminergic neurons in the central nervous system. The SNc has reciprocal connections with the striatum, with essential function for motor control and cognition. Furthermore, the SNc subregions receive input from visual and oculomotor cortical regions via the caudate nucleus and project to the colliculi (Mai and Paxinos 2011). About 50% of the neurons in the VTA (A10) are dopaminergic. The VTA has unilateral projections to the striatum, and reciprocal connections with noradrenergic (locus coeruleus), serotonergic

(raphe), cholinergic (pedunculotegmental) and GABAergic brainstem regions, as well as connections to the nucleus accumbens and globus pallidus, limbic and neocortical areas. Approximately 65-85% of mesolimbic VTA neurons, but only 30-40% of mesocortical VTA neurons are dopaminergic. The mesolimbic pathway supplies the nucleus accumbens, hypothalamus, amygdala, prefrontal cortex, hippocampus and neighboring cortex with dopamine (Mai and Paxinos 2011).

Here, we present analyses of fMRI data from the BioCog study, a cohort study targeting the prediction of POD and POCD in cognitively healthy female and male patients  $\geq 65$  years undergoing elective surgery. We hypothesized that VTA and SNc functional connectivity alterations predisposes to POCD, and furthermore, that alterations would parallel the development of POCD.

Recently, probabilistic magnetic resonance imaging (MRI) atlases of dopaminergic nuclei in the brainstem have become publicly available, offering new opportunities for analyses of dopaminergic system dysfunction in POCD (Bianciardi *et al.* 2015; Singh *et al.* 2019). We calculated functional connectivity of the VTA and SNc with 132 other cortical and subcortical brain regions before surgery and at follow-up three months after surgery, and analyzed the association of POCD with selected principal components of VTA and SNc functional connectivity.

## 2 Methods

### 2.1 Study design

The BioCog (Biomarker Development for Postoperative Cognitive Impairment in the Elderly, [www.biocog.eu](http://www.biocog.eu); [clinicaltrials.gov: NCT02265263](https://clinicaltrials.gov/ct2/show/study/NCT02265263)) study is an EU-funded multicenter prospective observational cohort study with the aim of identifying risk factors for POD and POCD. Patients were enrolled at the Charité – Universitätsmedizin Berlin, Germany, and the University Medical Center Utrecht, Netherlands. The study was conducted in line with the Helsinki Declaration. All procedures were approved by the local ethics committees in Berlin, Germany (EA2/092/14) and Utrecht, Netherlands (14-469).

### 2.2 Participants

Here, we analyse a subsample of 214 surgical patients from the Berlin cohort of the BioCog study. Consenting patients aged  $\geq 65$  years presenting for elective surgery with an expected duration  $> 60$ min were included. Patients were excluded from study in case of positive screening for pre-existing major neurocognitive disorder defined as a Mini-Mental Status Examination (MMSE) score  $\leq 23$  points, any condition interfering with neurocognitive assessment (severe sensory impairment, neuropsychiatric illness), expected unavailability for follow-up assessment, accommodation in an institution due to official or judicial order or inability to give informed consent. All participants gave written informed consent prior to inclusion.

### 2.3 Outcome: POCD

In total, the BioCog dataset provides data about POCD incidence after three months for 427 patients of the Berlin cohort. Neuropsychological testing took place at baseline before surgery, and three months after surgery. To adjust for natural variability in cognitive performance and learning effects in repeated cognitive testing, POCD was defined according to the Reliable Change Index (RCI) with the ISPOCD criteria proposed by Rasmussen (Rasmussen *et al.* 2001) implemented in the POCD package for R (<https://github.com/Wiebachj/POCDr>) (Spies *et al.* 2021). The RCI is the patient's change in performance at a cognitive test parameter after surgery compared to baseline performance in relation to the mean change in a non-surgical control group. POCD was diagnosed in patients with an RCI score below -1.96 in at least two single cognitive test parameters (i.e., showing a more severe performance decline than approximately 97.5% of the reference population) and/or a compound RCI averaged over all single RCIs in the follow-up assessment three months after surgery.

POCD incidence was determined in relation to a non-surgical control group: 114 participants without indication for surgery but otherwise identical in- and exclusion criteria were invited to perform consecutive neuropsychological testing at baseline and three months to adjust for natural learning effects in cognitive testing (Rasmussen *et al.* 2001). Non-surgical control participants were recruited from outpatient clinics, primary care, elderly homes and via calls at public talks (Feinkohl *et al.* 2020).

Testing was performed by trained study assistants in accordance with a standard operating procedure which was consented to by two neuropsychologists. Two independent assessors checked the data on plausibility including the review of free-text entries of research team members. When data for a participant were incomplete, missing values were imputed. If the data were missing due to impairment of concentration or poor understanding of test instruction according to the administering researcher, missing data were replaced with the worst performance value of the entire patient group, assuming that missingness reflects inability to perform the test due to cognitive decline. When values were missing at random, e.g. due to technical difficulties or environmental disturbances, random forest imputation was applied to replace missing values. Data were not imputed when neuropsychological testing was missing completely. The missForest package for R Statistical Software (RRID:SCR\_001905) was used for imputations (Stekhoven and Bühlmann 2012).

The following cognitive test parameters have been used for the calculation of POCD: mean correct latency from the Simple Reaction Time (SRT, processing speed), number of correctly remembered items in the free recall task (VRM free recall) as well as the number of correctly recognised items after delay on the Verbal Recognition Memory test (VRM recognition, verbal memory), span length in the Spatial Span task (SSP, working memory), the first trial memory score from the Paired Associate Learning test (PAL, visual memory) as implemented in the CANTAB test battery (RRID:SCR\_003001), as well as completion time of the Trail-Making-Test-B (TMT-B, executive functions) and completion time for the Grooved Pegboard test (GPT, fine motor skills). We selected these tests due to their moderate-to-good retest-reliability in the control group (intraclass coefficient between baseline and three months  $\geq 0.75$  based on a mean of multiple measurements, absolute-agreement, 2-way mixed-effects models) for this purpose (Feinkohl *et al.* 2020). Prior to calculation, SRT, GPT and TMT-B were log-transformed and sign-reversed to achieve an approximate normal distribution and a correspondence of higher scores with better cognitive performance. Details on single cognitive tests are given elsewhere (Lammers *et al.* 2018).

For each cognitive test parameter, the corresponding RCI was calculated as  $RCI = (\Delta X - \Delta X_c) / sd_{\Delta X_c}$ .  $\Delta X$  refers to the difference in test scores after surgery compared to baseline and  $\Delta X_c$  refers to the mean test score difference between the corresponding measurement time points in the non-surgical control group. RCI is normalized to the standard deviation (sd) of mean differences in the control group  $SD_{\Delta X_c}$ . The compound RCI for each patient was defined as the sum of all RCIs in relation to the standard deviation of the sum of RCIs in the control group ( $RCI_c$ ):  $compound\ RCI = \Sigma(RCI) / sd_{\Sigma(RCI)}$ .

## 2.4 Neuroimaging

### 2.4.1 MRI acquisition

MRI data were collected before surgery at the Berlin Center for Advanced Neuroimaging using a 3T Magnetom Trio MR scanner (Siemens, Erlangen, Germany). After three months, patients were invited to a follow-up session at the same scanner.

For resting-state fMRI data acquisition, the scanning room was darkened and the patient was instructed to close her/his eyes and to rest quietly without mental focusing in the scanner bore. Resting-state fMRI was performed using a 12-channel head coil and 2D echo-planar blood oxygenation level dependent (BOLD) sequence (field of view: 192·192 mm in 32 transverse slices, 9mm<sup>3</sup> isotropic voxels, repetition time=2.0s, excitation time=20ms, 78° flip angle).

T1-weighted 3D anatomical brain scans were acquired with a 32-channel head coil using a magnetization prepared rapid gradient echo (field of view: 256·256 mm<sup>2</sup> in 192 sagittal slices, 1mm<sup>3</sup> isotropic voxels, repetition time=2.5s, excitation time=4.77ms, 7° flip angle).

## 2.4.2 Seed ROI definition

Seed ROIs of the substantia nigra, pars compacta (SNc, A9) and ventral tegmental area (VTA, A10) were defined by masks from the Brainstem Navigator 0.9 (Brainstem Imaging Lab, Athinoula A. Martinos Center for Biomedical Imaging) (Bianciardi *et al.* 2015, 2018; García-Gomar *et al.* 2019, 2022; Singh *et al.* 2019; Singh, García-Gomar and Bianciardi 2021; Brainstem Navigator 2021).

## 2.4.3 Functional MRI preprocessing and connectivity analyses

Results included in this manuscript come from analyses performed using CONN (RRID:SCR\_009550) 22.a and SPM 12.7771 (RRID:SCR\_007037) for MATLAB R2022b (RRID:SCR\_001622) (Penny *et al.* 2006; Whitfield-Gabrieli and Nieto-Castanon 2012; Nieto-Castanon and Whitfield-Gabrieli 2022). The default preprocessing and denoising pipeline implemented in CONN have been used (see supplement for details)

Seed-based connectivity maps and ROI-to-ROI connectivity matrices were estimated characterizing the patterns of functional connectivity between the two seed ROIs (VTA, SNc) and 132 target ROIs from the Harvard-Oxford atlas. Functional connectivity strength was represented by Fisher-transformed bivariate correlation coefficients from a weighted general linear model (Nieto-Castanon and Whitfield-Gabrieli 2022), defined separately for each pair of seed and target areas, modeling the association between their BOLD signal time series. Individual scans were weighted by a boxcar signal characterizing pre- and postoperative resting-state fMRI sessions convolved with an SPM canonical hemodynamic response function and rectified.

Quality assessment of structural and functional imaging data was conducted by two researchers (FLL, CK) in accordance with previously described protocols (Backhausen *et al.* 2016; Morfini, Whitfield-Gabrieli and Nieto-Castañón 2023). In addition, all data underwent inspection for anatomical findings ineligible for analysis and histograms of denoised data.

Additional details on the neuroimaging methods are given in the supplementary material.

## 2.5 Statistical analysis

All statistical analyses were conducted in R (RRID:SCR\_001905). 95% confidence intervals (CI) for regression coefficients (B) and odds ratios (OR) were calculated based on 100,000 bootstrap iterations.

### 2.5.1 Dimensionality reduction in resting-state functional connectivity data

Principal component analysis (PCA) was used to reduce data dimensions in preoperative functional connectivity data for VTA and SNc.

The motivation for PCA is multifold: First, previous research provided too little information for a hypothesis-driven analysis in a restricted set of target ROIs. However, the number of available functional connections was relatively high compared to the number of patients in the sample, and conducting analyses as independent tests was not possible without either significant loss of statistical power or an unacceptable increase in false-positive results. Second, we expected high collinearity in the functional connectivity data, and PCA was used to transform them into sets of orthogonal variables for regression analysis.

Last but not least, dimensionality reduction by PCA seemed reasonable from a biological perspective: In contrast to GABA and glutamate, cerebral concentrations of dopamine are low. Furthermore, dopaminergic neurotransmission is terminated by uptake via dopamine and norepinephrine transporters (DAT and NET), which are not located in the synaptic cleft. Hence, dopamine molecules diffuse from the site of release and act on receptors in the distance before removal (volume transmission) (Brady *et al.* 2012). Dopaminergic neurons from the VTA innervate vast areas of the human and primate cortex (Berger, Gaspar and Verney

1991; Zubair *et al.* 2021). Hence, a process affecting dopaminergic neurotransmission might not exert strong, regionally limited, but rather subtle and widely distributed effects on BOLD signal fluctuations. Delirium is an encephalopathy as a consequence of systemic disturbances rather than an inherent brain disorder (Androsova *et al.* 2015; Maldonado 2018; Aldecoa *et al.* 2024) and delirium-related cerebral dysfunction, including POCD, are expected to affect the whole brain (Cavallari *et al.* 2016, 2017; van Montfort *et al.* 2018a, 2018b; Fislage *et al.* 2024). Hence, a transformation of the data allowing to select components related to global BOLD signal fluctuations over components to regionally limited signal changes may be a better approximation to the expected underlying neurobiology of POCD and dopaminergic network function.

PCA was conducted separately in two data matrices of preoperative VTA and SNc functional connectivity separately. Matrix rows reflected patients and each matrix column reflected the functional connectivity of the seed region to one of 132 target ROI of the Harvard-Oxford atlas.

Principal components explaining at least 5% of variance in the preoperative functional connectivity were considered for further analysis. This criterion was chosen post-hoc after inspection of PCA results, since we found that commonly used rules-of-thumb to determine the number of components to retain were not expedient (Keho 2012): Retaining all principal components with eigenvalues  $>1$  or explaining well above 50% of the cumulative variance would still have resulted in an inacceptably high number of independent test, and the Cattell scree test was not conclusive. In addition, the amount of variance explained by each component was generally low, and we considered that retaining principal component explaining less than 5% of data variance would no longer fit the assumption on dopaminergic transmission outlined above.

For longitudinal analyses of VTA and SNc functional connectivity in POCD, postoperative components were constructed by multiplying postoperative functional connectivity data with factor loadings from PCA of preoperative functional connectivity data (Brasanac *et al.* 2022; Lammers-Lietz *et al.* 2023). Since these scores were not derived from PCA directly, we refer to them as postoperative components rather than principal components. Step by step, PCA of preoperative functional connectivity data yields:  $X_{pre}V_{pre}=U_{pre}$  ( $X_{pre}$ : matrix of original preoperative functional connectivity data;  $V_{pre}$ : matrix with factor loadings derived from PCA;  $U_{pre}$ : matrix with preoperative factor scores). Postoperative components  $U'_{post}$  were calculated as  $X_{post}V_{pre}=U'_{post}$  ( $X_{post}$ : matrix with postoperative functional connectivity data).

We hypothesized that not only functional connectivity strength between seed and target ROI might be affected by surgery and change over time, but also networks might change over time, and the assumption that preoperative factor loadings apply to postoperative networks might not hold. In an additional approach, exploratory approach, we considered multi-factor analysis (MFA), which extends the concept of PCA to grouped or multi-table data, i.e., neuroimaging data collected at two distinct fMRI sessions (Abdi, Williams and Valentin 2013). MFA calculates a matrix of variable loadings of both pre- and postoperative data without a-priori assumptions on relations between variables (i.e., without assumption of identical networks over time) and then provides factor scores spanning both pre- and postoperative functional connectivity data. MFA was conducted separately for VTA and SNc connectivity in two separated data matrices with each row representing a patient with available pre- and postoperative fMRI data. Each of the 164 columns in each matrix represents a functional connection between the seed and one of 132 target ROIs from one of two fMRI sessions. Columns were weighted by fMRI session.

## 2.5.2 Regression analyses

### 2.5.2.1 Preoperative data

Two separate logistic regression models were used to analyse associations of either preoperative VTA or SNc functional connectivity with POCD as the dependent variables. No occurrence of POCD was the reference category (assigned values: 1 for POCD, 0 for no POCD occurrence). Separate models for VTA and SNc functional connectivity were set up, yielding a total number of four regression models. For each seed ROI, all principal components explaining more than 5% of variance were included as the independent variables of

interest in one single logistic regression model. All analyses were adjusted for age, sex, MMSE score at inclusion, ASA physical status, type of surgery and anaesthesia as well as duration of anaesthesia. The significance threshold was set to  $p < 0.05$  and Benjamini-Hochberg-adjustments were made for testing the total amount of principal components over both regression models.

#### 2.5.2.2 Longitudinal data

Postoperative components were tested for difference between patients with and without POCD three months after surgery in linear regression models. Postoperative components were treated as the dependent variables. POCD incidence was the independent variable of interest. All analyses were adjusted for preoperative principal component score, and interaction between preoperative principal component score and POCD, age, sex, MMSE score at inclusion, ASA physical status, type of surgery and anaesthesia as well as duration of anaesthesia.

Multi-factor analyses results were analysed as dependent variables in linear regression models with POCD as the independent variable of interest adjusted for age, sex, MMSE score at inclusion, ASA physical status, type of surgery and anaesthesia as well as duration of anaesthesia. Factors were not adjusted for preoperative scores since factors are derived from both pre- and postoperative functional connectivity and the regression models reflect group differences in perioperative dopaminergic network differences.

The level of significance was set to  $p < 0.05$  and adjusted for the total number of components considered in the longitudinal connectivity analysis using the Benjamini-Hochberg method.

## 3 Results

### 3.1 Description of the cohort

5294 patients were screened and 747 patients were included in Berlin, of whom 61 dropped out before preoperative assessments. 320 patients enrolled at the Charité-Universitätsmedizin Berlin provided fMRI data. One subject was excluded prior to preprocessing due to a significant brain lesion as described earlier (Lammers *et al.* 2018). Another 13 patients were excluded during the quality assessment, leaving 306 patients in total for further analysis. 196 out of 306 patients underwent fMRI at follow-up after three months. 214/306 patients with preoperative data and 193/196 patients with pre- and postoperative fMRI data also provided POCD assessments. In total, 26 out of 214 patients (12%), and 24 out of 193 patients with MRI at follow-up (12%) had POCD. In total, 24 patients with fMRI at baseline and 20 patients with fMRI at follow-up had postoperative delirium. 3 out of 26 (12%) and 2 auf 24 (8%) with POD later developed POCD, respectively.

Table 1 characterizes the cohort of 214 patients with preoperative fMRI data and POCD assessment. The flow chart is presented in figure 1. Figure 2 displays VTA and SNc functional networks as identified for the whole cohort.



**TABLE 1: Description of 214 patients with preoperative fMRI data.**

|                                          | N      | %       |          |
|------------------------------------------|--------|---------|----------|
| POCD                                     | 26     | 12%     |          |
| POD (N=212)                              | 24     | 11%     |          |
| female                                   | 86     | 40%     |          |
| Intracranial surgery                     | 2      | 1%      |          |
| Intrathoracal/-abdominal/-pelvic surgery | 73     | 34%     |          |
| ISCED 1-2 (N=193)                        | 34     | 18%     |          |
| ISCED 5-6 (N=193)                        | 82     | 42%     |          |
| Regional                                 | 10     | 5%      |          |
| Combined general/regional                | 35     | 16%     |          |
|                                          | Median | IQR     | Min-max. |
| Age (y)                                  | 72     | 68-75   | 65-87    |
| MMSE (p)                                 | 29     | 28-30   | 24-30    |
| ASA-PS                                   | II     | II-II   | I-III    |
| Duration of anaesthesia (min)            | 143    | 100-220 | 36-506   |
| CCI (p)                                  | 1      | 0-2     | 0-9      |

*A deviating N is stated in case of missing data.*

*ASA-PS: American Society of Anesthesiologists Physical Status, CCI: Charlson comorbidity index, ISCED: International Standard Classification of Education, MMSE: Mini-Mental Status Examination, POD: postoperative delirium, POCD: postoperative cognition dysfunction;*

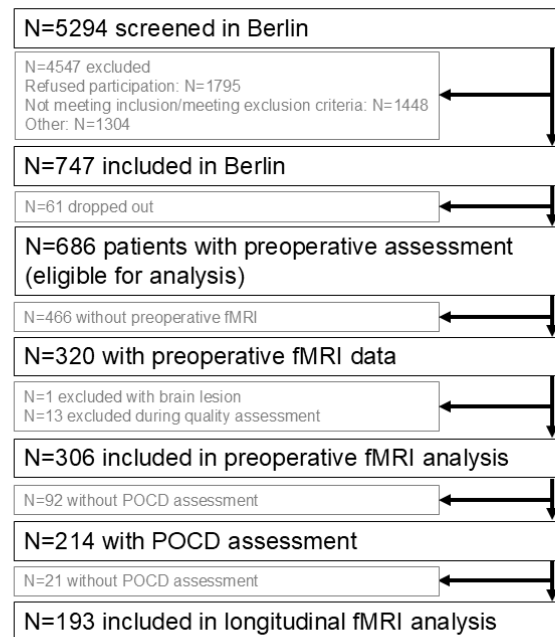

**FIGURE 1: Patient flow chart.**

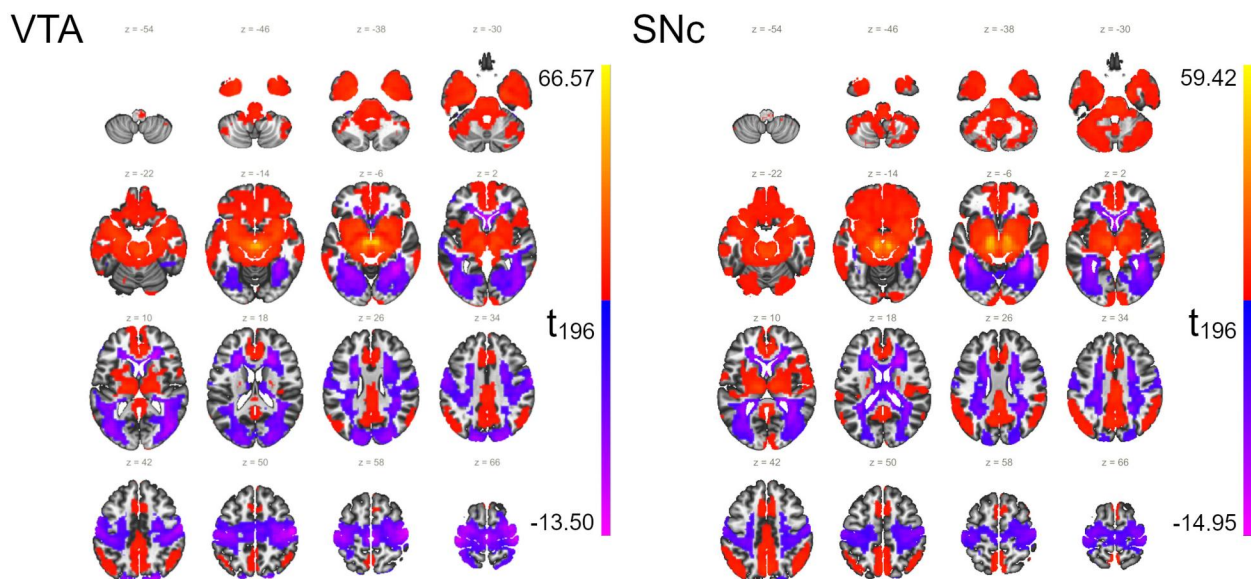

**FIGURE 2: Voxel-wise description of VTA (left) and SNc (right) functional networks in CONN.** All voxels with significant functional connectivity to the seed ROI over all patients in the sample in a one-sample t-test are highlighted. Please note that the maps describe VTA and SNc networks in the whole cohort rather than between group differences. See supplement for details.

## 3.2 Data reduction

VTA: The first component had an eigenvalue of 13.7, explaining 10.4% of variance. 28 principal components had eigenvalues above 1, explaining 74.6% of cumulative variance in VTA connectivity. Each of the first four components explained >5% of the whole variance and 31.3% of the variance in summation, and were thus chosen for regression analysis. The first four principal components seemed to reflect dopaminergic impact on learning and memory formation (PC1), sensorimotor system (PC2), global connectivity strength of the VTA (PC3) as well as cognition and spatial processing (PC4).

SNC: The first component had an eigenvalue of 15.4, explaining 11.7% of variance. 28 principal components had eigenvalues above 1, explaining 74.9% of cumulative variance in SNC connectivity. Each of the first four components explained >5%, and 32.0% in summation of the whole variance and were thus chosen for regression analysis. The first four components seemed to reflect dopaminergic influence on sensory perception and processing (PC1), global connectivity strength of the SNC (PC2), sensation and interoception (PC3) as well as learning and memory formation (PC4).

Figure S1 gives a detailed overview on factor loadings by functional connections for each of the eight retained principal components.

## 3.3 Preoperative functional connectivity

### 3.3.1 Associations of preoperative functional connectivity with POCD three months after surgery

The fourth principal component reflecting VTA connectivity to areas related to higher cognition and spatial processing was significantly associated with POCD. Patients with higher values on this component had a decreased risk for POCD ( $B=-0.276$ , 95% CI=[-0.554; -0.124], OR=0.759 [0.575; 0.883],  $p=0.042$ ).

The first principal component reflecting preoperative SNC connectivity to brain areas involved in sensory perception and processing was significantly associated with POCD. Patients with higher values on this component had an increased risk for POCD ( $B=0.165$  [0.028; 0.389], OR=1.180 [1.028; 1.476],  $p=0.042$ ).

At an unadjusted level of significance, age and ASA physical status were positively associated with POCD occurrence. We also found that all patients with intracranial surgery ( $N=2$ ) developed POCD, which motivated a sensitivity analysis, as the etiology of cognitive decline after intracranial surgery may differ from the rest of the cohort: After exclusion of these two patients from the sample, results did not change.

Figure 3 displays the construction of principal components significantly associated with POCD. Details on the full regression models (table S1) and results of sensitivity analysis are given in the supplement.

## 3.4 Postoperative functional connectivity

After adjustment for multiple testing, none of the components of postoperative functional connectivity constructed from PCA and none of the factors derived from multi-factor analysis differed significantly between patients with POCD and control patients without POCD. Details are given in supplementary tables S2 and S3.

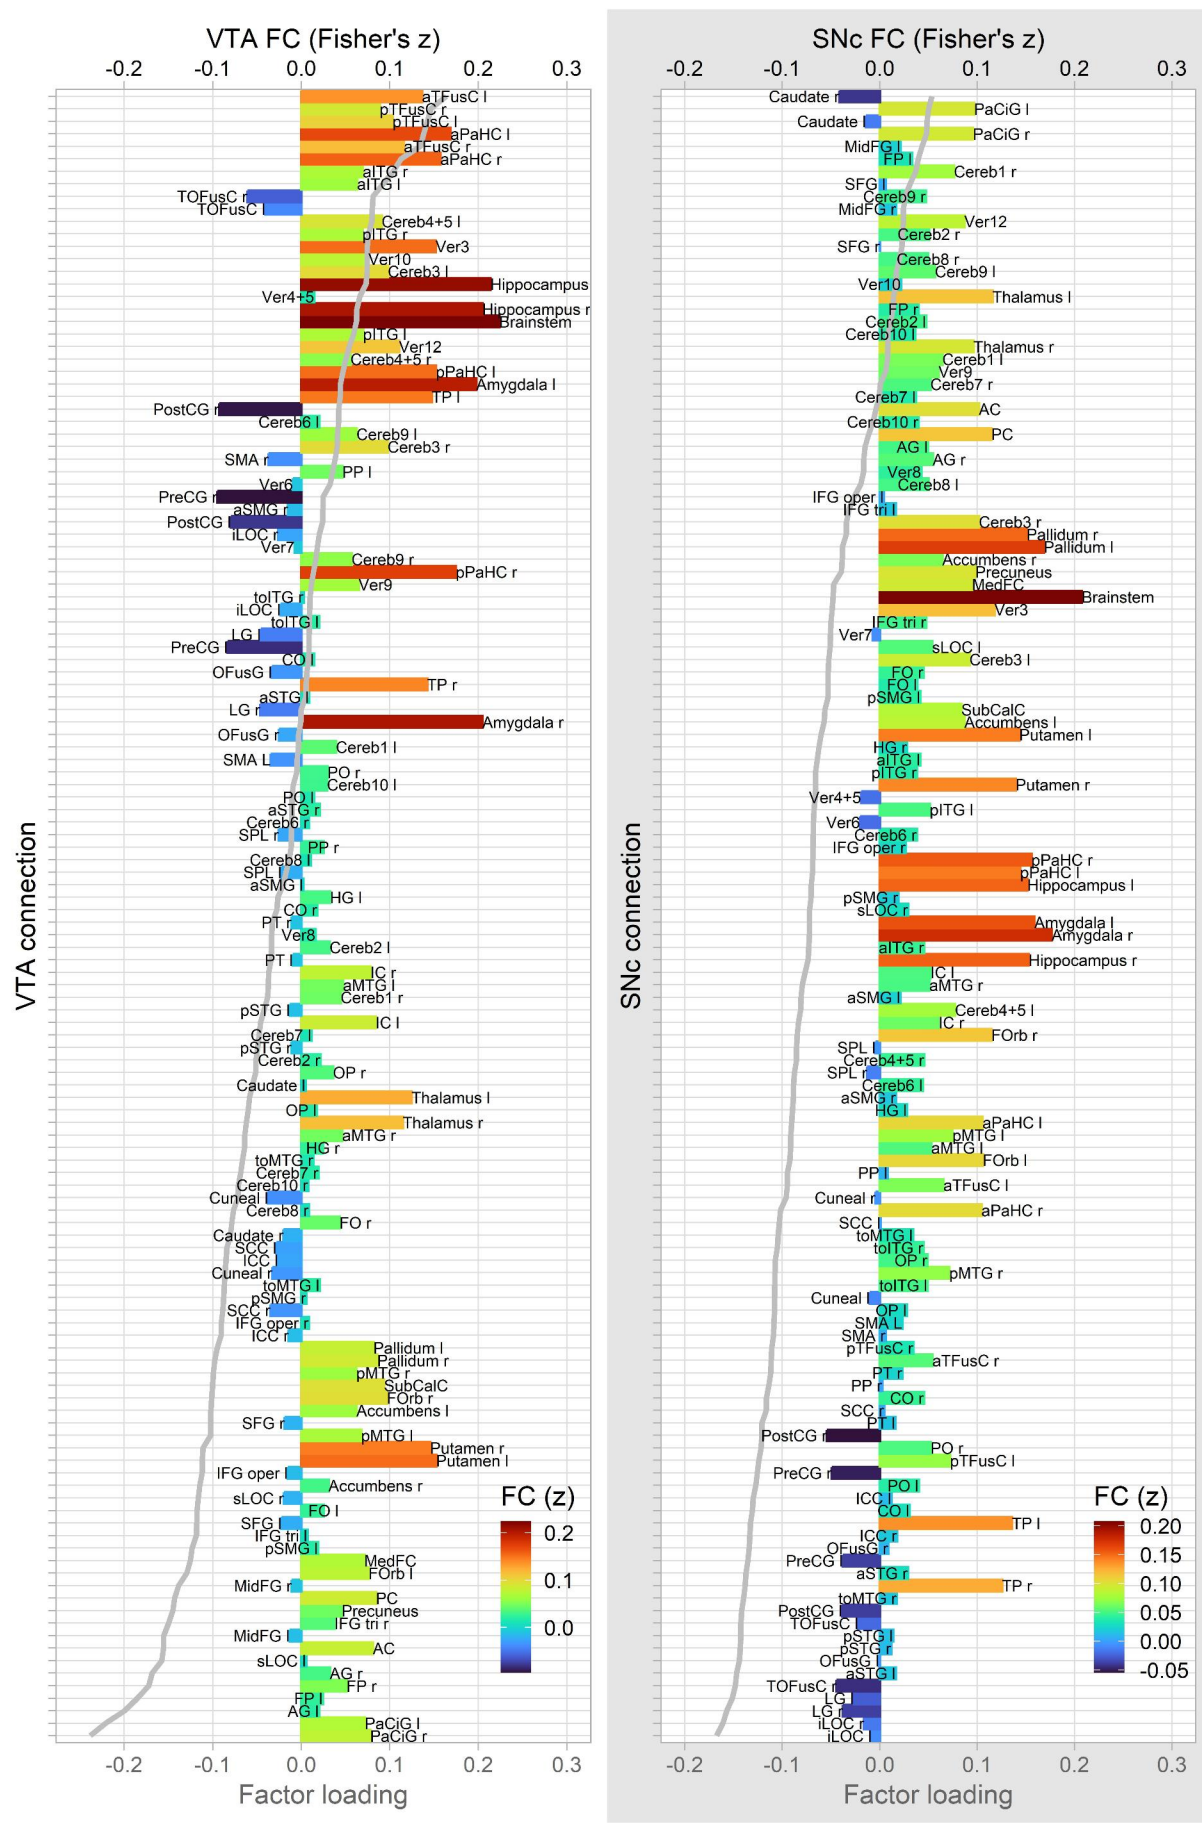

**FIGURE 3: Construction of principal components.** PC4 for VTA (cognition and spatial processing, left) and PC1 for SNc (sensory perception and processing, right, grey shading) were found to be significantly associated with POCD risk

*in logistic regression analyses. Loadings of functional connectivity (FC) between each seed ROI (VTA and SNc) to the respective target ROI (labels) on the components are superimposed as grey line graphs. Bar blots display sample mean functional connectivity (designated by height and colourization) between seed and target ROI. Connections are ordered by principal component loadings.*

## 4 Discussion

In this study, we analysed altered functional connectivity of the VTA and SNc in patients with POCD from large cohort undergoing elective surgery. Few studies have investigated VTA functional connectivity in POD (Choi *et al.* 2012; Oh *et al.* 2019), but studies for POCD were missing. We observed that both altered VTA and SNc functional connectivity predispose to POCD, but no functional connectivity alterations after surgery in patients with POCD.

### 4.1 VTA and SNc networks

VTA and SNc showed functional connectivity with vast cortical areas (figure 2). Although three major dopaminergic pathways originating from the mesencephalon are often stated in the literature (i.e., the meso-cortical, the mesolimbic and the nigrostriatal systems), for both VTA (Berger, Gaspar and Verney 1991; Kwon and Jang 2014; Zubair *et al.* 2021) and SNc (Berger, Gaspar and Verney 1991; Kwon and Jang 2014; Zhang and Burock 2020) more vast and diffuse projections have also been described. Similar diffuse functional connectivity patterns had previously described in various populations by Giordano, Zhang and Peterson (Zhang *et al.* 2016; Peterson *et al.* 2017; Giordano *et al.* 2018): In summary, all groups describe a network comprising positive connections to prefrontal, pre- and postcentral, temporal, insular and (posterior) cingulate cortical areas, as well as the parahippocampal gyrus, thalamus, large portions of the basal ganglia, amygdala, the mesencephalon and cerebellum. Anticorrelated network parts in the occipital and posterior parietal cortex, middle and superior temporal gyri were also consistent between our work and the studies by Zhang and Peterson (Zhang *et al.* 2016; Peterson *et al.* 2017). Major differences between our and previous descriptions of dopaminergic networks affect the posterior parahippocampal gyrus: We found to have strong coactivation of the parahippocampal gyrus with both VTA and SNc, whereas previous studies reported suppression of parahippocampal activation during activation of dopaminergic nuclei (Zhang *et al.* 2016; Peterson *et al.* 2017; Giordano *et al.* 2018).

We used PCA to reduce the preoperative functional connectivity data and principal components may be interpreted as subsections of the VTA and SNc networks which are independent of each other and may show more or less prominent expression in individual patients. Corresponding postoperative subsections were calculated by applying the rotation matrix to postoperative functional connectivity. This approach maintains one-to-one correspondence between pre- and postoperative components with an intuitive interpretation, but is insensitive to postoperative changes which cancel each other out. We also used MFA to reduce both pre- and postoperative data in one step. Whereas this approach provides a less intuitive interpretation, disentangling of pre- and postoperative alterations is difficult, dimensions in MFA describe common the variance of pre- and postoperative functional connectivity and hence account for longitudinal changes in network configurations.

### 4.2 Preoperative alterations in the dopaminergic networks predispose to POCD

VTA and SNc preoperative functional connectivity patterns were associated with POCD. Altered functional connectivity of dopaminergic functional networks has already been described to be associated with cognitive function in older patients (De Marco and Venneri 2018), in Parkinson's disease (Li *et al.* 2020; O'Shea *et al.* 2022; Zang *et al.* 2022) and in Alzheimer's dementia (De Marco and Venneri 2018; Serra *et al.* 2018; Karim, Fahad and Rathore 2024). It has further been found that VTA disconnection to the posterior cingulate and precentral cortex precedes conversion from MCI to Alzheimer's dementia (Serra *et al.* 2021). Our data suggest that preoperative dopaminergic dysfunction may contribute to cognitive decline after surgery and anaesthesia.

For both VTA and SNc, one principal component of preoperative functional connectivity was associated with POCD. Higher scores on the fourth principal component of VTA connectivity were protective against POCD, whereas higher scores on the first principal component of SNc connectivity increased the risk for POCD. The directions of principal components are arbitrary, but meaningful within the context of functional connectivity (i.e., correlated or anti-correlated BOLD signal fluctuations within an ROI) and factor loadings. From a simplified perspective, a target ROI with a high positive loading would contribute to a high score on the respective principal component when the BOLD signal fluctuations between seed and target ROI are strongly positively correlated (indicating simultaneous neuronal activation in seed and target ROI). Vice versa, a target ROI with a negative loading would also contribute to a high score on a principal component when the BOLD fluctuations between seed and target ROI are anticorrelated (indicating that the target ROI activation is particularly suppressed during seed ROI activation). Low scores on a principal component result from combinations of either negative loadings for target ROIs with correlated BOLD fluctuations or positive loadings for target ROIs with anticorrelated BOLD fluctuations.

With respect to the VTA, strong functional connectivity to the anterior and posterior fusiform cortex (aTFusC and pTFuSC), the anterior parahippocampal cortex (aPaHC) and anterior inferior temporal gyrus (aITG) seem to decrease risk for POCD. In contrast, strong connectivity of the VTA to the medial frontal cortex (MedFC), frontal orbital cortex (FOrb), frontal pole (FP), cingulate and paracingulate cortex (AC, PC and PaCig), angular gyrus (AG) and precuneus was associated with increased risk for POCD. In summary, higher preoperative VTA connectivity to temporal and hippocampal areas may protect against POCD, whereas strong integration of frontal, cingular and parietal areas into the VTA network would predispose for cognitive decline after surgery.

These areas show substantial overlap with regions which respond to deep brain stimulation of the VTA in an animal experiment with both increase and suppression of the BOLD response, i.e., prefrontal cortex, limbic areas, primary sensorimotor areas, and the basal ganglia (Settell *et al.* 2017). Areas with positive component loadings, i.e., the fusiform gyrus, the inferior temporal cortex and the parahippocampal gyrus, have been associated with spatial processing as well as other higher cognitive functions (Mai and Paxinos 2011; Aminoff, Kveraga and Bar 2013; Landin-Romero *et al.* 2016; Pidgeon *et al.* 2016; Conway 2018; Burns, Arnold and Bukach 2019). Areas with negative component loadings are highly connected multimodal association areas often involved in complex cognitive tasks, salience and motivational control, i.e., precuneus, medial frontal cortex (van den Heuvel and Sporns 2011), the angular gyrus, the precuneus and posterior cingulate cortex (Seghier 2013; Rolls 2019; Messina *et al.* 2023), the prefrontal and cingulate cortex (Rolls 2019; Friedman and Robbins 2022). Furthermore, the precuneus, orbital, cingulate and paracingulate cortex have been associated with schizophrenia and hallucinations (Wysiadecki *et al.* 2021; Messina *et al.* 2023; Merola *et al.* 2024). Of note, patients with schizophrenia have increased dopaminergic neurotransmission during psychosis (McCutcheon *et al.* 2018), dopaminergic deficits may account for negative symptoms during remission (Avram *et al.* 2019; Brandl *et al.* 2023).

For the SNc, strong connectivity to the paracingulate cortex (PaCig) and impaired suppression of caudate activity during SNc activity would contribute to high scores on the first component with increased risk for POCD, but most notably, a large cluster of brain regions with un- or anticorrelated BOLD fluctuations (i.e., neuronal suppression during SNc activation) had negative factor loadings. Similar to our findings for the VTA, these areas were altered in schizophrenia and psychosis (Wysiadecki *et al.* 2021; Merola *et al.* 2024). The cluster of suppressed ROIs comprised the pre- and postcentral gyri (PreCG, PostCG), the temporooccipital cortex (TOFusC), lingual gyrus (LG) and lower occipital cortex (iLOC), whereas the ROIs with more or less uncorrelated BOLD fluctuations cover the occipito-temporal cortex, i.e. the occipital fusiform gyrus (OFusG) and intracalcarine cortex (ICC) the lingual gyrus as well as parts of the anterior and posterior superior temporal gyrus (aSTG and pSTG) and temporooccipital middle temporal gyrus (toMTG). Strong neuronal suppression during SNc activity would contribute to a high score on the first principal component and hence increase the risk for POCD. The majority of these areas are involved in primary sensory perception

(Mai and Paxinos 2011) as well as higher sensory processing (Hickok and Poeppel 2007; Milner and Cavina-Pratesi 2018; Burns, Arnold and Bukach 2019). Hence, both stronger SNc functional connectivity with or impaired suppression of schizophrenia-associated areas as well as stronger suppression of primary and higher sensory cortices predisposes to POCD.

The association of POCD with dopaminergic connectivity to regions associated with schizophrenia and hallucinations is interesting, since POCD is more common in patients who have experienced POD (Norkienė *et al.* 2010; Franck *et al.* 2016), and dopaminergic dysfunction in these areas may equally account for symptoms in schizophrenia, POD and POCD. However, POD was rare in the investigated sample and POCD prevalence was not increased in patients with POD, questioning an overlap between these entities. Recent studies on VTA, and to a lesser extent, SNc connectivity in schizophrenia described predominantly reduced dopaminergic connectivity to subcortical and vast occipital, temporal, parietal, insular and frontal areas (Schulz *et al.* 2022), whereas in our data, only decreased functional connectivity between VTA and hippocampus, parahippocampal gyrus, postcentral cortex and fusiform cortex was associated with POCD.

### 4.3 No evidence for postoperative alterations of dopaminergic connectivity in POCD

By using two different approaches to identify postoperative functional connectivity patterns, we identified no postoperative changes associated with POCD. Our results are limited as both approaches allow that counteracting longitudinal changes in distinct functional connections cancel each other out. So far our results suggest that the development of POCD may be related to a chronic condition which is present before surgery rather dopaminergic dysfunction induced by anaesthesia and surgery. This conclusion may further be supported by our notion that age, and ASA physical status as an indicator for the patient's general preoperative health status were associated with POCD and that characteristics of surgery and anaesthesia had relatively little impact on POCD risk.

Previous studies on AD and amnesic MCI reported decreased functional connectivity of the VTA with the parietal lobe, precentral cortex, posterior cingulate cortex and precuneus (Serra *et al.* 2018, 2021). However, in our data, decreased functional connectivity of the posterior cingulate cortex, precuneus and sections of the parietal lobe (i.e., angular and supramarginal gyrus, superior parietal lobe, parietal operculum) were associated with decreased risk for POCD. In PD, decreased functional connectivity of the SNc with thalamus, pallidum, caudate nucleus and putamen were reported (Li *et al.* 2020; Zang *et al.* 2022). In our data, only decreased functional connectivity of the SNc with putamen and pallidum was associated with increased risk for POCD, whereas lower connectivity to the thalamus and caudate was found to be protective. These differences rather suggest that POCD is an entity distinct from AD or PD.

### 4.4 Limitations

We here describe the functional connectivity patterns of the VTA and SNc to address dopaminergic dysfunction in POCD. However, the specificity of our approach for dopaminergic system alterations is limited, for several reasons: First, both VTA and SNc contain a substantial part of non-dopaminergic neurons (Mai and Paxinos 2011). Second, it is unknown if coactivation between the dopaminergic seed ROI and non-dopaminergic target ROI originates from the seed ROI and reflects dopamine release or originates from the target ROI and may hence be non-dopaminergic. Third, we do not know about non-dopaminergic relay structures. Functional connectivity between SNc and cortex may be indirect and mediated via the basal ganglia. Furthermore, dopamine is a vasoactive substance with direct effects on blood vessels, which may only partially be mediated by neuronal activity (Krimer *et al.* 1998). Finally, VTA and SNc are only a part of the brain's dopaminergic system: The retrorubral fields (RRF, A8) also contain dopaminergic cells, and further minor groups of dopaminergic neurons are found in the periaqueductal grey (A11), zona incerta (A13), hypothalamus (A12, A14, A15) and the olfactory bulb (A16) as well as the retina (A17) (Mai and Paxinos 2011). For



these, no probabilistic maps are available, and most of these regions are too small to provide robust signal in conventional fMRI.

Postoperative cognitive decline has been assessed as POCD according to ISPOCD criteria (Rasmussen *et al.* 2001), which was the scientific standard at the time of study conduction, but only considered neuropsychological testing as a sole criterion for POCD. The current nomenclature replaced POCD with postoperative neurocognitive disorder (NCD) and requires functional impairment and subjective cognitive concern as additional criteria (Evered *et al.* 2018). Hence, our study provides no information on the relevance of dopaminergic network dysfunction for daily activities. Loss to follow-up was high in the BioCog study, especially among patients with POD, e.g., in a recent analysis of diffusion tensor imaging data, more than one-third of patients did not return for follow-up MRI (Fislage *et al.* 2024). It is likely that patients with severe cognitive decline, delayed physical recovery after surgery and functional impairments did not return for MRI, and hence, we underestimate the relevance of the dopaminergic system for POCD.

Principal component regression was used for data reduction. The selected number of components retained for analysis was arbitrary, and explained only one-third of variance in VTA and SNc functional connectivity in total. Each component explained only 5-10% of the total variance. While this, on the one hand, may suggest that major artifacts and non-neuronal sources of fMRI signal fluctuation have been removed during preprocessing, it also means that most dopaminergic functional connectivity has been ignored in our analysis. The use of PCA or MFA has limitations, especially in the analysis of longitudinal data, which may also account for negative findings in postoperative alterations of dopaminergic connectivity in POCD.

## 4.5 Conclusion

Altered preoperative functional connectivity of the dopaminergic system predisposes to POCD. Particularly relevant regions are associated with sensory, especially spatial perception, higher cognitive functions as well as regions thought to be involved in schizophrenia and hallucinations. We observed no associations of POCD with postoperative SNc or VTA functional connectivity, suggesting that dopaminergic network dysfunction is a predisposing, possibly chronic feature in POCD. However, VTA and SNc functional connectivity in patients with Alzheimer's or Parkinson's disease or schizophrenia shows little similarity with our results in POCD, suggesting that these conditions share little pathomechanistic features. To our knowledge, we here provide the first report on dopaminergic network dysfunction in POCD. Future studies may hence consider the dopaminergic system as a potential treatment and prevention target for POCD, but especially the question of dopaminergic hyper- or hypofunction in POCD remains further research. Studies on antidopaminergic treatment of POD will need to consider the potential longterm effects of their intervention on cognition as well.

## 5 Acknowledgements and disclosing remarks

We acknowledge the contributions of Pharmimage Biomarker Solutions GmbH during the conduct of this study.

## 6 Statement on sex and gender

Sex, but not gender, was recorded as either male and female, without a standard operating procedure for the assessment of sex. Research staff was allowed to record sex according to both the patient's self-report or the patient file.

## 7 Data availability statement

Data from the BioCog study contain sensitive patient information and are not publicly available due to constraints imposed in the consent forms and data protection regulations. An anonymized version is available

from the authors (Claudia Spies and Georg Winterer) upon reasonable request in accordance with legal restrictions.

## 8 Author contributions statement

All authors contributed significantly to this study: Florian Lammers-Lietz: conceptualization, investigation, methodology, formal analysis, writing – original draft; Friedrich Borchers: methodology, investigation, formal analysis, data curation, validation; Insa Feinkohl: methodology, investigation, formal analysis; Cicek Kanar: formal analysis; Henning Krampe: investigation, writing – original draft; Gregor Lichtner: methodology; Claudia Spies: conceptualization, funding acquisition, data curation, resources, project administration; Jayanth Sreekanth: methodology; Janine Wiebach: methodology, formal analysis; Georg Winterer: conceptualization, funding acquisition, data curation, resources, project administration; Martin Weygandt: methodology; Friedemann Paul: conceptualization, supervision

## 9 Disclosure of interests

Dr. Spies reports grants from DFG/German Research Society, Einstein Foundation Berlin, Deutsches Zentrum für Luft- und Raumfahrt e.V. (DLR)/German Aerospace Center, Projektträger im DLR/Project Management Agency, Gemeinsamer Bundesausschuss (GBA)/Federal Joint Committee, inneruniversity grants, Stifterverband/Non-Profit Society Promoting Science and Education, European Society of Anesthesiology and Intensive Care, BMWI – Federal Ministry of Economic Affairs and Climate Action, Dr. F. Köhler Chemie GmbH, Sintetica GmbH, Max-Planck-Gesellschaft zur Förderung der Wissenschaft e.V., Metronic, BMBF – Federal Ministry of Education and Research, Robert Koch Institute and payments by Georg Thieme Verlag, board activity for Prothor, Takeda Pharmaceutical Company Ltd., Lynx Health Science GmbH, AWMF (Association of the Scientific Medical Societies in Germany), DFG, Deutsche Akademie der Naturforscher Leopoldina e.V. (German National Academy of Sciences Leopoldina), Berliner Medizinische Gesellschaft, European Society of Intensive Care Medicine (ESICM), European Society of Anaesthesiology and Intensive Care (ESAIC), Deutsche Gesellschaft für Anästhesiologie und Intensivmedizin (DGAI)/German Society of Anaesthesiology and Intensive Care Medicine, German Interdisciplinary Association for Intensive Care and Emergency Medicine (DIVI) as well as patents 15753 627.7, PCT/EP 2015/067731, 3 174 588, 10 2014 215 211.9, 10 2018 114 364.8, 10 2018 110 275.5, 50 2015 010 534.8, 50 2015 010 347.7, 10 2014 215 212.7. None of the other authors has a conflict of interest to declare.

## 10 Funding sources

The BioCog Project was funded by the European Union Seventh Framework Program [FP7/2007- 2013] under grant agreement n° 602461. The funder did not participate in or take influence on the collection or analysis of the data or writing of the manuscript.

## 11 Declaration of generative AI and AI-assisted technologies in the writing process

Artificial intelligence has not been used during the preparation of the manuscript. The supplementary section on fMRI preprocessing and functional connectivity analyses has been automatically generated by CONN software and was edited by the authors.

## 12 References

Abdi H, Williams LJ, Valentin D. Multiple factor analysis: principal component analysis for multitable and multiblock data sets. *WIREs Computational Statistics* 2013;5:149–79.

- Abildstrom H, Rasmussen LS, Rentowl P *et al.* Cognitive dysfunction 1-2 years after non-cardiac surgery in the elderly. ISPOCD group. International Study of Post-Operative Cognitive Dysfunction. *Acta Anaesthesiol Scand* 2000;**44**:1246–51.
- Aldecoa C, Bettelli G, Bilotta F *et al.* Update of the European Society of Anaesthesiology and Intensive Care Medicine evidence-based and consensus-based guideline on postoperative delirium in adult patients. *Eur J Anaesthesiol* 2024;**41**:81–108.
- Aminoff EM, Kveraga K, Bar M. The role of the parahippocampal cortex in cognition. *Trends Cogn Sci* 2013;**17**:379–90.
- Androsova G, Krause R, Winterer G *et al.* Biomarkers of postoperative delirium and cognitive dysfunction. *Front Aging Neurosci* 2015;**7**:112.
- Avram M, Brandl F, Cabello J *et al.* Reduced striatal dopamine synthesis capacity in patients with schizophrenia during remission of positive symptoms. *Brain* 2019;**142**:1813–26.
- Backhausen LL, Herting MM, Buse J *et al.* Quality Control of Structural MRI Images Applied Using FreeSurfer-A Hands-On Workflow to Rate Motion Artifacts. *Front Neurosci* 2016;**10**:558.
- Berger B, Gaspar P, Verney C. Dopaminergic innervation of the cerebral cortex: unexpected differences between rodents and primates. *Trends Neurosci* 1991;**14**:21–7.
- Bianciardi M, Strong C, Toschi N *et al.* A probabilistic template of human mesopontine tegmental nuclei from in vivo 7 Tesla MRI. *Neuroimage* 2018;**170**:222–30.
- Bianciardi M, Toschi N, Edlow BL *et al.* Toward an In Vivo Neuroimaging Template of Human Brainstem Nuclei of the Ascending Arousal, Autonomic, and Motor Systems. *Brain Connect* 2015;**5**:597–607.
- Borchers F, Spies CD, Feinkohl I *et al.* Methodology of measuring postoperative cognitive dysfunction: a systematic review. *Br J Anaesth* 2021;**126**:1119–27.
- Brady ST, Siegel GJ, Albers RW *et al.* *Basic Neurochemistry: Principles of Molecular, Cellular and Medical Neurobiology / Editor-in-Chief, Scott T. Brady ; Editor-in-Chief Emeritus, George J. Siegel ; Editors, R. Wayne Albers, Donald L. Price.* 8th edition. Waltham, Mass: Elsevier, 2012.
- Brainstem Navigator. 2021.
- Brandl F, Knolle F, Avram M *et al.* Negative symptoms, striatal dopamine and model-free reward decision-making in schizophrenia. *Brain* 2023;**146**:767–77.
- Brasanac J, Hetzer S, Asseyer S *et al.* Central stress processing, T-cell responsivity to stress hormones and disease severity in multiple sclerosis. *Brain Communications* 2022;**4**:fcac086.
- Burns EJ, Arnold T, Bukach CM. P-curving the fusiform face area: Meta-analyses support the expertise hypothesis. *Neuroscience & Biobehavioral Reviews* 2019;**104**:209–21.
- Cavallari M, Dai W, Guttmann CRG *et al.* Neural substrates of vulnerability to postsurgical delirium as revealed by presurgical diffusion MRI. *Brain* 2016;**139**:1282–94.

- Cavallari M, Dai W, Guttmann CRG *et al.* Longitudinal diffusion changes following postoperative delirium in older people without dementia. *Neurology* 2017;**89**:1020–7.
- Choi S-H, Lee H, Chung T-S *et al.* Neural Network Functional Connectivity During and After an Episode of Delirium. *AJP* 2012;**169**:498–507.
- Conway BR. The Organization and Operation of Inferior Temporal Cortex. *Annu Rev Vis Sci* 2018;**4**:381–402.
- Craig D, Hart DJ, Carson R *et al.* Psychotic symptoms in Alzheimer’s disease are not influenced by polymorphic variation at the dopamine receptor DRD3 gene. *Neurosci Lett* 2004;**368**:33–6.
- Dasgupta M, Dumbrell AC. Preoperative risk assessment for delirium after noncardiac surgery: a systematic review. *J Am Geriatr Soc* 2006;**54**:1578–89.
- De Marco M, Venneri A. Volume and Connectivity of the Ventral Tegmental Area are Linked to Neurocognitive Signatures of Alzheimer’s Disease in Humans. *J Alzheimers Dis* 2018;**63**:167–80.
- Duprey MS, Devlin JW, Griffith JL *et al.* Association Between Perioperative Medication Use and Postoperative Delirium and Cognition in Older Adults Undergoing Elective Noncardiac Surgery. *Anesth Analg* 2022;**134**:1154–63.
- Evered L, Silbert B, Knopman DS *et al.* Recommendations for the nomenclature of cognitive change associated with anaesthesia and surgery-2018. *Br J Anaesth* 2018;**121**:1005–12.
- Feinkohl I, Borchers F, Burkhardt S *et al.* Stability of neuropsychological test performance in older adults serving as normative controls for a study on postoperative cognitive dysfunction. *BMC Res Notes* 2020;**13**:55.
- Fislage M, Winzeck S, Woodrow R *et al.* Structural disconnectivity in postoperative delirium: A perioperative two-center cohort study in older patients. *Alzheimers Dement* 2024, DOI: 10.1002/alz.13749.
- Franck M, Nerlich K, Neuner B *et al.* No convincing association between post-operative delirium and post-operative cognitive dysfunction: a secondary analysis. *Acta Anaesthesiol Scand* 2016;**60**:1404–14.
- Friedman NP, Robbins TW. The role of prefrontal cortex in cognitive control and executive function. *Neuropsychopharmacol* 2022;**47**:72–89.
- García-Gomar MG, Strong C, Toschi N *et al.* In vivo Probabilistic Structural Atlas of the Inferior and Superior Colliculi, Medial and Lateral Geniculate Nuclei and Superior Olivary Complex in Humans Based on 7 Tesla MRI. *Front Neurosci* 2019;**13**:764.
- García-Gomar MG, Videnovic A, Singh K *et al.* Disruption of Brainstem Structural Connectivity in REM Sleep Behavior Disorder Using 7 Tesla Magnetic Resonance Imaging. *Mov Disord* 2022;**37**:847–53.
- Giordano GM, Stanziano M, Papa M *et al.* Functional connectivity of the ventral tegmental area and avolition in subjects with schizophrenia: a resting state functional MRI study. *Eur Neuropsychopharmacol* 2018;**28**:589–602.

- Girard TD, Jackson JC, Pandharipande PP *et al.* Delirium as a predictor of long-term cognitive impairment in survivors of critical illness. *Crit Care Med* 2010;**38**:1513–20.
- Gonin P, Beysard N, Yersin B *et al.* Excited Delirium: A Systematic Review. *Academic Emergency Medicine* 2018;**25**:552–65.
- van den Heuvel MP, Sporns O. Rich-club organization of the human connectome. *J Neurosci* 2011;**31**:15775–86.
- Hickok G, Poeppel D. The cortical organization of speech processing. *Nat Rev Neurosci* 2007;**8**:393–402.
- Holmes C, Smith H, Ganderton R *et al.* Psychosis and aggression in Alzheimer’s disease: the effect of dopamine receptor gene variation. *J Neurol Neurosurg Psychiatry* 2001;**71**:777–9.
- Karim SMS, Fahad MS, Rathore RS. Identifying discriminative features of brain network for prediction of Alzheimer’s disease using graph theory and machine learning. *Front Neuroinform* 2024;**18**:1384720.
- Keho Y. The Basics of Linear Principal Components Analysis. *Principal Component Analysis* 2012, DOI: 10.5772/38577.
- Krimer LS, Muly EC, Williams GV *et al.* Dopaminergic regulation of cerebral cortical microcirculation. *Nat Neurosci* 1998;**1**:286–9.
- Kuzuhara S. Drug-induced psychotic symptoms in Parkinson’s disease. Problems, management and dilemma. *J Neurol* 2001;**248 Suppl 3**:III28-31.
- Kwon HG, Jang SH. Differences in neural connectivity between the substantia nigra and ventral tegmental area in the human brain. *Front Hum Neurosci* 2014;**8**, DOI: 10.3389/fnhum.2014.00041.
- Lammers F, Borchers F, Feinkohl I *et al.* Basal forebrain cholinergic system volume is associated with general cognitive ability in the elderly. *Neuropsychologia* 2018;**119**:145–56.
- Lammers-Lietz F, Borchers F, Feinkohl I *et al.* Brain mineralization in postoperative delirium and cognitive decline. 2023:2023.12.02.23299086.
- Landin-Romero R, Tan R, Hodges JR *et al.* An update on semantic dementia: genetics, imaging, and pathology. *Alzheimer’s Research & Therapy* 2016;**8**:52.
- Li W, Lao-Kaim NP, Roussakis A-A *et al.* Longitudinal functional connectivity changes related to dopaminergic decline in Parkinson’s disease. *NeuroImage: Clinical* 2020;**28**:102409.
- Mai JK, Paxinos G. *The Human Nervous System / Edited by Juergen K. Mai, George Paxinos*. 3rd ed. Burlington: Elsevier Science, 2011.
- Maldonado JR. Neuropathogenesis of delirium: review of current etiologic theories and common pathways. *Am J Geriatr Psychiatry* 2013;**21**:1190–222.
- Maldonado JR. Delirium pathophysiology: An updated hypothesis of the etiology of acute brain failure. *Int J Geriatr Psychiatry* 2018;**33**:1428–57.
- Mash DC. Excited Delirium and Sudden Death: A Syndromal Disorder at the Extreme End of the Neuropsychiatric Continuum. *Front Physiol* 2016;**7**, DOI: 10.3389/fphys.2016.00435.

- McCutcheon R, Beck K, Jauhar S *et al.* Defining the Locus of Dopaminergic Dysfunction in Schizophrenia: A Meta-analysis and Test of the Mesolimbic Hypothesis. *Schizophrenia Bulletin* 2018;**44**:1301–11.
- Merola GP, Tarchi L, Saccaro LF *et al.* Transdiagnostic markers across the psychosis continuum: a systematic review and meta-analysis of resting state fMRI studies. *Front Psychiatry* 2024;**15**:1378439.
- Messina A, Cucci G, Crescimanno C *et al.* Clinical anatomy of the precuneus and pathogenesis of the schizophrenia. *Anat Sci Int* 2023;**98**:473–81.
- Milner AD, Cavina-Pratesi C. Perceptual deficits of object identification: apperceptive agnosia. *Handb Clin Neurol* 2018;**151**:269–86.
- van Montfort SJT, van Dellen E, van den Bosch AMR *et al.* Resting-state fMRI reveals network disintegration during delirium. *NeuroImage: Clinical* 2018a;**20**:35–41.
- van Montfort SJT, Numan T, van Dellen E *et al.* Delirium is not associated with altered hub flexibility of the posterior cingulate cortex. *Clin Neurophysiol* 2018b;**129**:2541–3.
- Morfini F, Whitfield-Gabrieli S, Nieto-Castañón A. Functional connectivity MRI quality control procedures in CONN. *Front Neurosci* 2023;**17**:1092125.
- van Munster BC, de Rooij SEJA, Yazdanpanah M *et al.* The association of the dopamine transporter gene and the dopamine receptor 2 gene with delirium, a meta-analysis. *American Journal of Medical Genetics Part B: Neuropsychiatric Genetics* 2010a;**153B**:648–55.
- van Munster BC, Yazdanpanah M, Tanck MWT *et al.* Genetic polymorphisms in the DRD2, DRD3, and SLC6A3 gene in elderly patients with delirium. *American Journal of Medical Genetics Part B: Neuropsychiatric Genetics* 2010b;**153B**:38–45.
- Nieto-Castanon A, Whitfield-Gabrieli S. CONN functional connectivity toolbox: RRID:SCR\_009550, Version 22. 2022.
- Norkienė I, Samalavičius R, Misiūrienė I *et al.* Incidence and risk factors for early postoperative cognitive decline after coronary artery bypass grafting. *Medicina (Kaunas)* 2010;**46**:460–4.
- Oh J, Shin JE, Yang KH *et al.* Cortical and subcortical changes in resting-state functional connectivity before and during an episode of postoperative delirium. *Aust N Z J Psychiatry* 2019;**53**:794–806.
- O’Shea IM, Popal HS, Olson IR *et al.* Distinct alterations in cerebellar connectivity with substantia nigra and ventral tegmental area in Parkinson’s disease. *Sci Rep* 2022;**12**:3289.
- Penny WD, Friston KJ, Ashburner J *et al.* eds. *Statistical Parametric Mapping: The Analysis of Functional Brain Images*. Elsevier, 2006.
- Peterson AC, Zhang S, Hu S *et al.* The Effects of Age, from Young to Middle Adulthood, and Gender on Resting State Functional Connectivity of the Dopaminergic Midbrain. *Front Hum Neurosci* 2017;**11**:52.
- Pidgeon LM, Grealy M, Duffy AHB *et al.* Functional neuroimaging of visual creativity: a systematic review and meta-analysis. *Brain Behav* 2016;**6**:e00540.

- Pietzsch M, Weber SA, Winterer G *et al.* A Model-Based Estimation of Annual Long-Term Care Costs in Germany Following Post-Operative Cognitive Dysfunction (POCD) in Elderly Patients. Stoleski S (ed.). *JPHI* 2021;**3**:23–36.
- Pisani MA, Kong SYJ, Kasl SV *et al.* Days of Delirium Are Associated with 1-Year Mortality in an Older Intensive Care Unit Population. *Am J Respir Crit Care Med* 2009;**180**:1092–7.
- Rasmussen LS, Larsen K, Houx P *et al.* The assessment of postoperative cognitive function. *Acta Anaesthesiol Scand* 2001;**45**:275–89.
- Rolls ET. The cingulate cortex and limbic systems for emotion, action, and memory. *Brain Struct Funct* 2019;**224**:3001–18.
- Rudolph JL, Marcantonio ER, Culley DJ *et al.* Delirium is associated with early postoperative cognitive dysfunction. *Anaesthesia* 2008;**63**:941–7.
- Schrag A. Psychiatric aspects of Parkinson’s disease. *J Neurol* 2004;**251**:795–804.
- Schulz J, Zimmermann J, Sorg C *et al.* Magnetic resonance imaging of the dopamine system in schizophrenia - A scoping review. *Front Psychiatry* 2022;**13**:925476.
- Seghier ML. The angular gyrus: multiple functions and multiple subdivisions. *Neuroscientist* 2013;**19**:43–61.
- Serra L, D’Amelio M, Di Domenico C *et al.* In vivo mapping of brainstem nuclei functional connectivity disruption in Alzheimer’s disease. *Neurobiol Aging* 2018;**72**:72–82.
- Serra L, D’Amelio M, Esposito S *et al.* Ventral Tegmental Area Disconnection Contributes Two Years Early to Correctly Classify Patients Converted to Alzheimer’s Disease: Implications for Treatment. *J Alzheimers Dis* 2021;**82**:985–1000.
- Settell ML, Testini P, Cho S *et al.* Functional Circuitry Effect of Ventral Tegmental Area Deep Brain Stimulation: Imaging and Neurochemical Evidence of Mesocortical and Mesolimbic Pathway Modulation. *Front Neurosci* 2017;**11**:104.
- Singh K, García-Gomar MG, Bianciardi M. Probabilistic Atlas of the Mesencephalic Reticular Formation, Isthmic Reticular Formation, Microcellular Tegmental Nucleus, Ventral Tegmental Area Nucleus Complex, and Caudal-Rostral Linear Raphe Nucleus Complex in Living Humans from 7 Tesla Magnetic Resonance Imaging. *Brain Connect* 2021;**11**:613–23.
- Singh K, Indovina I, Augustinack JC *et al.* Probabilistic Template of the Lateral Parabrachial Nucleus, Medial Parabrachial Nucleus, Vestibular Nuclei Complex, and Medullary Viscero-Sensory-Motor Nuclei Complex in Living Humans From 7 Tesla MRI. *Front Neurosci* 2019;**13**:1425.
- Spies CD, Knaak C, Mertens M *et al.* Physostigmine for prevention of postoperative delirium and long-term cognitive dysfunction in liver surgery: A double-blinded randomised controlled trial. *European Journal of Anaesthesiology | EJA* 2021;**38**:943–56.
- Steinmetz J, Christensen KB, Lund T *et al.* Long-term consequences of postoperative cognitive dysfunction. *Anesthesiology* 2009;**110**:548–55.
- Stekhoven DJ, Bühlmann P. MissForest--non-parametric missing value imputation for mixed-type data. *Bioinformatics* 2012;**28**:112–8.

- Suraarunsumrit P, Srinonprasert V, Kongmalai T *et al.* Outcomes associated with postoperative cognitive dysfunction: a systematic review and meta-analysis. *Age Ageing* 2024;**53**:afae160.
- Sweet RA, Devlin B, Pollock BG *et al.* Catechol-O-methyltransferase haplotypes are associated with psychosis in Alzheimer disease. *Mol Psychiatry* 2005;**10**:1026–36.
- Teipel SJ, Fritze T, Ellenrieder M *et al.* Association of joint replacement surgery with incident dementia diagnosis in German claims data. *Int Psychogeriatr* 2018;**30**:1375–83.
- Whitfield-Gabrieli S, Nieto-Castanon A. Conn: a functional connectivity toolbox for correlated and anticorrelated brain networks. *Brain Connect* 2012;**2**:125–41.
- Wysiadecki G, Mazurek A, Walocha J *et al.* Revisiting the Morphology and Classification of the Paracingulate Gyrus with Commentaries on Ambiguous Cases. *Brain Sci* 2021;**11**:872.
- Yoo HS, Jeong SH, Oh KT *et al.* Interrelation of striatal dopamine, brain metabolism and cognition in dementia with Lewy bodies. *Brain* 2022;**145**:4448–58.
- Zang Z, Song T, Li J *et al.* Modulation effect of substantia nigra iron deposition and functional connectivity on putamen glucose metabolism in Parkinson’s disease. *Human Brain Mapping* 2022;**43**:3735–44.
- Zhang S, Hu S, Chao HH *et al.* Resting-State Functional Connectivity of the Locus Coeruleus in Humans: In Comparison with the Ventral Tegmental Area/Substantia Nigra Pars Compacta and the Effects of Age. *Cereb Cortex* 2016;**26**:3413–27.
- Zhang Y, Burock MA. Diffusion Tensor Imaging in Parkinson’s Disease and Parkinsonian Syndrome: A Systematic Review. *Front Neurol* 2020;**11**, DOI: 10.3389/fneur.2020.531993.
- Zubair M, Murriss SR, Isa K *et al.* Divergent Whole Brain Projections from the Ventral Midbrain in Macaques. *Cereb Cortex* 2021;**31**:2913–31.
